1 **Behavioral and metabolic consequences after a single generation of angling**  
2 **selection in brown trout**

3

4

5 Jenni M. Prokkola<sup>1,2,\*</sup>, Nico Alioravainen<sup>1</sup>, Lauri Mehtätalo<sup>1</sup>, Pekka Hyvärinen<sup>3</sup>, Alexandre  
6 Lemopoulos<sup>1,4</sup>, Sara Metso<sup>1</sup>, Anssi Vainikka<sup>1</sup>

7

8 <sup>1</sup> University of Eastern Finland, Department of Environmental and Biological Sciences, P.O.  
9 box 111, FI-80101 Joensuu, Finland

10 <sup>2</sup> University of Liverpool, Institute of Integrative Biology, Crown Street, L69 7ZB Liverpool,  
11 UK

12 <sup>3</sup> Natural Resources Institute Finland (Luke), Kainuu Fisheries Research Station,  
13 Manamansalontie 90, FI-88300 Paltamo, Finland

14 <sup>4</sup> University of Turku, Department of Biology, FI-20014 Turku, Finland

15 \*Corresponding author, email [jenni.prokkola@liverpool.ac.uk](mailto:jenni.prokkola@liverpool.ac.uk)

16

17 Key words: fishing, animal personality, respirometry, photoperiod, stress coping styles

18

19

20 **Abstract**

21 Human induced selection, including mortality caused by recreational angling, can cause  
22 phenotypic changes in wild populations. Brown trout (*Salmo trutta*) is an intensively fished  
23 salmonid that is also impacted by unintended hatchery-induced domestication, and thus  
24 provides a relevant model to study both angling- and hatchery-induced selection. We  
25 produced crosses of fish with high or low vulnerability to angling using two populations of  
26 brown trout –one wild and one reared in captivity for several generations– and reared the  
27 offspring in common garden conditions. We then assessed minimum and average metabolic  
28 rates, boldness and sensitivity to stress in juveniles at the age of 1 year. Our results show that  
29 angling selection had population-specific effects on risk taking -related latency and  
30 exploration tendency, and that populations differed on average in several measured traits,  
31 which could be due to a combination of genetic and non-genetic effects. Our study provides  
32 evidence for angling induced selection in juvenile personality and suggests that metabolic rate  
33 and stress sensitivity may also be affected. The context-dependent effects of angling selection  
34 indicate that easy solutions for fisheries management and conservation purposes to mitigate  
35 these changes may not exist.

## 36 **Introduction**

37 Selective harvesting of natural populations by humans induces strong selection (Fugère and  
38 Hendry 2018) and can increase the relative frequencies of maladaptive phenotypes (Allendorf  
39 and Hard 2009; Coltman et al. 2003). Empirical studies have shown that responses to human-  
40 induced selection can be rapid at both genetic (Cooke et al. 2007; Sutter et al. 2012; Uusi-  
41 Heikkilä et al. 2015) and phenotypic levels (Kern et al. 2016; Wong et al. 2012). In empirical  
42 and simulation studies of heavily exploited fish stocks, fisheries-induced evolution has  
43 decreased the size at maturity and growth rate of fish (Audzijonyte et al. 2013; Biro and Post  
44 2008; Devine et al. 2012; Nussle et al. 2009).

45  
46 In addition to large-scale fisheries using gillnets, trawls and other commercial gear,  
47 recreational and small-scale fisheries can also induce selection on vulnerability to fishing and  
48 traits that explain vulnerability (Cooke et al. 2007; Hollins et al. 2018; Redpath et al. 2010;  
49 Sutter et al. 2012; Uusi-Heikkilä et al. 2008). Regarding behavioral traits, selection from  
50 recreational fishing is expected to particularly affect boldness and exploration tendency  
51 (Arlinghaus et al. 2017). Bold and explorative fish are often the most vulnerable to angling,  
52 likely due to the required behavioral decisions from the fish (Cooke et al. 2007; Härkönen et  
53 al. 2014; Wilson et al. 2015), reviewed in (Lennox et al. 2017), though not in all studies  
54 (Louison et al. 2017; Vainikka et al. 2016). Over time, angling selection could increase the  
55 frequency of shy, slow-growth phenotypes in the population, which could lead to less  
56 efficient resource use and decreased population growth and thus diminished productivity  
57 (Andersen et al. 2018; Arlinghaus et al. 2017).

58  
59 Mechanisms mediating angling-induced selection are poorly understood, but several studies  
60 have found a correlation between behaviors affecting energy balance and minimum metabolic

61 rate (meta-analysis by Mathot et al. 2018), implying that selection acting on personality could  
62 thereby affect metabolism in fish. This relationship may be bidirectional, as metabolic rate is  
63 affected by behavior, but may also be the underlying cause for risk-taking behavior,  
64 depending on food availability (Killen et al. 2011). According to the pace-of-life syndrome  
65 (POLS) theory, boldness should correlate positively with metabolic rate, because a fast  
66 metabolic machinery requires high food intake, which again requires bold behavior (Réale et  
67 al. 2010). In one of the first empirical angling selection studies, standard metabolic rate was  
68 found to be 10% lower in a low vulnerability selection line compared to a high vulnerability  
69 selection line in largemouth bass (*Micropterus salmoides*) (Redpath et al. 2010). This  
70 supports the expectation of a positive correlation between vulnerability to angling and  
71 metabolic rate, however, several studies have found no association between these traits  
72 (Louison et al. 2017; Louison et al. 2018; Väätäinen et al. 2018) and more empirical studies in  
73 common garden conditions are needed to address this question.

74

75 Angling selection can be understood also in the light of stress coping styles (Louison et al.  
76 2017). Coping styles can be defined as consistent behavioral differences driven by varying  
77 neurochemical stress responses (Schjolden et al. 2005; Vindas et al. 2017a; Vindas et al.  
78 2017b). Proactive coping style is generally bold, routine-based and relies on a sympathetic  
79 stress response (involving catecholamines), while reactive type is shyer, more flexible in  
80 behavior, and relies on a parasympathetic stress response (involving glucocorticoids)  
81 (Koolhaas et al. 2010; Schjolden et al. 2005), although distinct types have not been identified  
82 in all studies, e.g., (Thomson et al. 2011). Selection by angling may therefore affect the  
83 neurochemical stress response of fish due to underlying correlations with behavior. In this  
84 scenario, a fish that responds to the presence of an angler with a high cortisol response is less  
85 likely caught than a non-stressed fish.

86

87 As many other taxa, salmonids can display distinctive behavioral strategies/syndromes and  
88 coping styles (Adriaenssens and Johnsson 2011; Brelin et al. 2008; Huntingford and Adams  
89 2005; Näslund and Johnsson 2016; Vindas et al. 2017b), which may provide resource- and  
90 life stage -dependent survival benefits. Salmonids are also affected by domestication in  
91 hatchery rearing, which impacts their life-history strategies, growth and behavior (Araki et al.  
92 2008; Horreo et al. 2018; Huntingford 2004) and can increase their vulnerability to angling  
93 (Klefoth et al. 2013). Brown trout (*Salmo trutta*), are one of the most targeted game fish  
94 species globally and endangered in parts of its native range in Europe. To understand the  
95 human impact on brown trout populations, empirical research on the consequences of angling  
96 is urgently needed. In this study, we asked whether already one generation of angling  
97 selection could induce observable changes in the behavior, metabolic rate, or cortisol response  
98 of brown trout. We studied fish from both wild and hatchery origin to assess the potential  
99 interplay between fishing- and hatchery-induced selection. We hypothesized that offspring  
100 from angling-vulnerable parents would have 1) higher scores in boldness-related behavior, 2)  
101 higher minimum metabolic rate, and 3) lower stress sensitivity compared to fish from non-  
102 vulnerable parents, and 4) that fish from hatchery stock parents would display more proactive  
103 stress coping styles compared to fish from wild parents.

104

## 105 **Material and methods**

### 106 *Angling experiment and fish husbandry*

107 Experiments on brown trout were carried out between 2015 and 2017 at the Natural  
108 Resources Institute Finland (Luke) Kainuu Fisheries Research Station ([www.kfrs.fi](http://www.kfrs.fi)) under  
109 licence obtained from the national Animal Experiment Board in Finland (licence number  
110 ESAVI/3443/04.10.07/2015). Two strains of brown trout were used. Wild, predominantly

111 non-migratory, parental fish from River Vaarainjoki were captured by electrofishing  
112 (generally non-selective fishing gear) during spawning time in 2010–2012 and brought to the  
113 research station. The second parental strain used was a hatchery strain (so-called Lake  
114 Oulujärvi hatchery broodstock). The parental fish were taken from two year-classes of the 2<sup>nd</sup>  
115 generation of the brood stock maintained in the same research station. The founders of the  
116 brood stock came from three hatchery stocks established from two source populations and  
117 reared in nearby hatcheries for 3–4 generations. These stocks originated from predominantly  
118 migratory (adfluvial) populations in the region (further details in Lemopoulos et al. (2019)).  
119 Despite originating from the same River Varisjoki watershed, the used populations showed  
120 moderate genetic divergence based on fixation index ( $F_{ST}$ -value) of 0.11 (Lemopoulos et al.  
121 2019). The wild population had been exposed to angling more recently than the hatchery  
122 population, although fishing pressure had been weaker than the fishing pressure on the  
123 migratory strain prior to hatchery rearing (P. Hyvärinen, unpublished observation).  
124  
125 During the whole study, fish were fed with commercial fish pellets (Raisio Oyj). In 2015,  
126 hatchery-origin and wild-origin adult fish were exposed to experimental fly fishing and  
127 divided into captured (high vulnerability, HV) and uncaptured (low vulnerability, LV) groups.  
128 Fish were fished in two size-assortative pools for each population during June and July with  
129 fly fishing gear adjusted by the size of the fish in the pools. The wild fish were fished in semi-  
130 natural 50-m<sup>2</sup> ponds with a gravel-bottom outer riffle sections and *ca.* 1 m deep, concrete  
131 inner pool sections (53 and 91 visually size-sorted fish in two ponds). The hatchery fish were  
132 fished in 75-m<sup>2</sup> concrete ponds with no structures (64 larger and 167 smaller fish from two  
133 different cohorts in two ponds). Angling was performed by experienced fly fishers (mainly  
134 A.V.) using unnaturally coloured woolly bugger -type fly patterns tied to barbless hooks.  
135 During angling sessions, an angler fished a pond until a fish took the fly or five minutes

136 passed, after which angling was continued at earliest one hour later. If a fish was captured,  
137 angling was continued immediately after processing, which included anaesthesia with  
138 benzocaine ( $40 \text{ mg L}^{-1}$ ), identification of passive integrated transponder (Oregon RFID) code  
139 or tagging when a pre-existing tag was missing, and measuring total length (to 1 mm) and  
140 weight (to 2 g). Fish that were missing PIT-tags were tagged under the skin next to the dorsal  
141 fin using 12 mm tags at this point. After processing, the fish were transferred to similar ponds  
142 (hatchery fish to a  $50 \text{ m}^2$  otherwise similar concrete pond) as used for each population during  
143 angling. After angling trials were finished, on 25 June 2015, all remaining wild fish that were  
144 not captured were collected by dip-netting after draining the experimental angling ponds,  
145 anaesthetized, measured and weighed (mean body lengths of fish uncaptured and captured by  
146 angling: in large fish 457 and 475 mm, respectively, and in small fish 344 and 354,  
147 respectively). Uncaptured wild fish were then combined in the same ponds as the fish  
148 captured by angling. The captured hatchery strain fish were subjected to a second round of  
149 angling  $\sim 2$  weeks later, where in total eight fish were captured and prioritized for breeding the  
150 HV-line, but this was not done on wild fish due to their limited availability. Angling trials  
151 finished on 8 July 2015, and also hatchery fish were transferred back to their original ponds.  
152 Because of the warm water at the time of finishing the second round of angling, the  
153 uncaptured hatchery fish were not measured to avoid handling-induced stress and mortality.  
154 One deep-hooked small hatchery fish was found dead 5 days and one large hatchery fish 41  
155 days after capture, but otherwise no mortality occurred between angling trials and the  
156 breeding.

157

158 The offspring used in this study were obtained from fish bred in four groups (i.e. high- and  
159 low-vulnerability [HV and LV, respectively] within each population) in the autumn of 2015.  
160 A replicated, fully factorial  $3 \times 3$  breeding design was used to create the  $F_1$ -generation; males

161 were crossed with females in all combinations in one matrix, and the matrices replicated three  
162 times for each group, details in Electronic Supplemental Material (ESM1, available online).  
163 In the autumn of 2016, the one-summer-old fish were tagged with individual 12-mm PIT-tags  
164 in the abdominal cavity under anaesthesia (benzocaine). After tagging, the selection lines  
165 were mixed together in two 3.2 m<sup>2</sup> fibreglass rearing tanks.

166

#### 167 *Photoperiod acclimations*

168 In mid-March 2017, after being reared under constant light, 100 fish were divided into two  
169 different photoperiod groups in 0.4-m<sup>2</sup> green, plastic, flow-through tanks. The tanks were  
170 covered with green nets. The first group continued to be reared under constant light (at water  
171 surface approximately 9 lux, N= 10/group, 40 fish in tank), and the second group received a  
172 12h:12h light-dark (L:D) acclimation (at water surface approximately 12 lux during light  
173 period, N = 15/group divided equally in two tanks, details in ESM1, available online). Fish  
174 were fed using automatic belt feeders (~0.3% fish mass per day) on 5–6 days per week during  
175 approx. 4 h between 8:00 and 20:00 to avoid the entrainment of endogenous rhythms by  
176 feeding. After a minimum two-week acclimation, the metabolic rate measurements were  
177 started.

178

#### 179 *Measurement of O<sub>2</sub> consumption*

180 The O<sub>2</sub> consumption ( $\dot{M}O_2$ ) was measured as a proxy of metabolic rate (Nelson 2016) using  
181 intermittent flow-through respirometry (Svendsen et al. 2016) with 15–17-min cycles. The  
182 fish were caught by dip-netting under a dim red light into 10-L buckets, identified with a PIT-  
183 reader and transferred to the flow-through measurement chambers immersed in a water bath,  
184 which was also immersed in a flow-through buffer tank. Measurements were started  
185 immediately and continued for approximately 23h, corresponding to 90–96 measurement



186 cycles for all individuals. After measurements, fish were anesthetized with benzocaine,  
187 measured for total length (to 1 mm) and weighed (to 0.1 g), after which they were transferred  
188 to new 0.4 m<sup>2</sup> tanks similar to those used prior to measurements, with the same photoperiods  
189 as before the measurements. Respirometer chamber oxygen levels were then measured empty  
190 for one cycle to quantify bacterial respiration rates. No measurable respiration was detected  
191 without fish. The slope of the decrease in oxygen level during each 3.5-minute measurement  
192 period was calculated using linear regression in AV Bio-Statistics v. 5.2 (by A.V., available at  
193 <http://www.kotikone.fi/ansvain/>). Because the  $\dot{M}O_2$  of fish was extremely low due to cold  
194 water temperature, we accepted all measurement periods with regression coefficients  $R^2 > 0.2$   
195 in the calculation (in total 28 slopes were excluded across all measurements). This was  
196 justified as visual inspection of the data revealed clear negative trends and excluding slopes  
197 with low  $R^2$  would have biased  $\dot{M}O_2$  estimates strongly upwards. Further details of the  
198 method are given in ESM1, available online.

199  
200 The minimum oxygen consumption ( $\dot{M}O_{2,min}$ ) was calculated from the average of the four  
201 least negative slopes after discarding the first, the last and the least negative slope. Values  
202 from three individuals were discarded as outliers ( $>3x$  SD difference to the mean). In  
203 addition, we calculated the average consumption across all measurements, excluding the first  
204 and last slope, for each fish ( $\dot{M}O_{2,ave}$ ) because the stress of being confined in the measurement  
205 chamber is reflected in oxygen consumption (Morgan and Iwama 1996; Murray et al. 2017).  
206 The coefficient of the relationship of  $\log_{10}(\dot{M}O_{2,min})$  and  $\log_{10}(\text{body mass in kg})$  was used to  
207 calculate mass-specific  $\dot{M}O_{2,min}$  for visualization, after (Killen et al. 2011).

208

209 *Behavioral trial setup*

210 Quantification of boldness in animals should involve an element of risk-taking. In  
211 experimental settings different measures, such as latency to explore a novel environment, are  
212 often used as proxies for boldness (Conrad et al. 2011; Johnsson and Näslund 2018). Here, we  
213 quantified the boldness of fish using different behaviors expressed in the presence of predator  
214 cues in a novel environment.

215

216 The fish were allowed to recover from respirometry for at least four days before behavioral  
217 trials to minimize potential effects of handling stress on behavior. They were not fed for 24-h  
218 prior to behavioral trials. The trials were conducted in custom-made mazes (Fig. 1) (size 400  
219 mm wide x 1500 mm long, water depth 100 mm in the open area). During the trials,  
220 temperature in the maintenance tanks and test arenas was on average  $4.5 \pm \text{SD } 1.3^\circ\text{C}$ . Water  
221 flow rate during the trials was adjusted to  $\sim 8 \text{ L min}^{-1}$  ( $\sim 7.6\text{--}8.8 \text{ L min}^{-1}$ ). This allowed for at  
222 minimum 1.26 times the arena volume of water to flow between consecutive trials, which was  
223 considered sufficient to minimize potential carry-over effects of chemical cues between trials.  
224 The arena was lit by LED lights (CRI90 LED chain in waterproof silicon tube, 3000-3300K,  
225  $4.8 \text{ W m}^{-2}$ ) situated along one long edge of the arena ( $>70 \text{ lux}$  across the arena depending on  
226 distance from light source). Half-way across the arena was a brick gate situated next to one  
227 side, allowing entry from the other side. Behind the brick, natural pebbles ( $\sim 3\text{--}5 \text{ cm}$  in  
228 diameter) were scattered unevenly on the floor, and one large stone was provided for shelter.  
229 A second large stone was placed in the center of the arena in front of the start box. Four  
230 similar arenas were used in the experiment, but they differed in the visual appearance of the  
231 natural stones and two of the arenas were mirror images of the other two with respect to the  
232 location of the gate.

233

234 Upstream from the flow-through test arena was a section divided by a metal grid (5 mm mesh  
235 size) where a hatchery-reared burbot (*Lota lota*) (length ~30-40 cm) was placed to introduce  
236 olfactory cues of a natural predator of juvenile brown trout. Burbot are nocturnal bottom-  
237 dwelling predators that are likely difficult for prey to detect visually, but their odor induces  
238 antipredator responses in prey species (Ylönen et al. 2007). Burbot were regularly fed with  
239 pieces of various cyprinids and vendace (*Coregonus albula*) during rearing, and only with  
240 fresh pieces of brown trout for two days prior to and during the trials. Burbot were moved to  
241 the test arenas at least one day before the trials. The burbot were fed with trout pieces in  
242 separate tanks and changed in each arena every 10–15 trials (2–3 days).

243  
244 Before each trial, individual brown trout were haphazardly removed from their rearing tanks  
245 using a dip-net under red light and placed into black 10-L buckets filled with ~8L of water  
246 from the flow-through system. Fish were identified by PIT tags and left undisturbed for 10  
247 min before being transferred into the start box located downstream from the test arena by  
248 pouring. During each trial, the trout was acclimatized in the start box for 3 min, after which  
249 the door of the box was opened by pulling a string from behind a curtain, and fish movements  
250 recorded from above using two CCTV infrared cameras (two arenas simultaneously filmed  
251 using the same camera) for 10 min (of which first 9 min 45 s was included in the behavior  
252 analysis). The behavioral trial was repeated three times between 8:00 and 11:00 for each focal  
253 fish, with an average time of 4.3 days (range 1–8 days) between consecutive trials. One trial  
254 from four fish was omitted from analysis due to error in data collection. The order in which  
255 batches of four fish were captured on the same day from the same tank for the four arenas was  
256 recorded (batch from hereon, levels 1–5, four individuals from batch 6/7 combined to batch  
257 5).

258

259 *Testing behavioral responses to burbot*

260 To confirm that burbot odor was perceived risky in the personality assays, we tested for the  
261 response of brown trout to burbot in separate controlled tests using individuals from wild HV  
262 and wild LV groups (N=10 in each). These fish were acclimated to similar tanks as the  
263 personality-tested fish at 12h:12h L:D photoperiod for one week before trials started. One  
264 individual died after the first trial. The behavior of each individual was tested on six different  
265 days in the presence and absence of predator (3 trials in each condition in haphazard order).  
266 3–4 different arenas were used for each fish on different days to reduce fish habituation to the  
267 arenas. These trials were conducted between 14:40 and 17:00. Control arenas were emptied  
268 and thoroughly rinsed with pressurized tap water and water flow maintained for >2h before  
269 the trials to avoid carry-over effects from burbot odor in earlier experiments. The water used  
270 in the flow-through system originates from lake Kivesjärvi, where burbot is a common  
271 species; thus, traces of burbot odor may have been present in all trials.

272

273 *Analysis of video recordings*

274 Behavioral data were collected from videos using manual tracking with AV Bio-Statistics 5.2  
275 timing software. The observer was blind to the identity of fish in all recordings. Analyses  
276 were conducted in haphazard order, and each trial was analyzed once. In total four people  
277 analyzed the videos. Four behaviors were recorded from the arena trials: 1) *latency* as the  
278 time from the start of the experiment until the whole body of fish emerged from the start box,  
279 (after Boulton et al. 2014; Moran et al. 2016; Vainikka et al. 2016); 2) time until fish passed  
280 the gate to the upstream section of the arena (arrow in Fig. 1), but this was not analyzed  
281 because of many fish not entering this section; instead we recorded 3) *exploration tendency* as  
282 a binary variable indicating whether the whole body of the fish passed the gate within the  
283 arena; and 4) *activity* of fish as the proportion of time spent actively swimming after emerging

284 from the start box. We used the proportion of time rather than absolute time active to reduce  
285 the dependence of activity from latency. Activity was thus calculated by dividing the total  
286 time when fish did not move when outside the start box by the total time spent outside the  
287 start box and subtracting the value from 1. Stillness was characterized as the fish not moving  
288 forward, backward or sideways for longer than ~2 s. Notably, activity by our definition refers  
289 to short-term activity in a risky, novel environment, not in a familiar environment as it is  
290 classically defined (Conrad et al. 2011), and it was recorded only from the trials in which the  
291 fish emerged from the start box.

292

### 293 *Cortisol response to confinement stress*

294 We measured the plasma cortisol levels from of a subset of the fish after exposure to a  
295 standardized confinement stress. During the tests, the fish were transferred to individual dark  
296 brown 10-L plastic buckets with 1.5 L water for 30 min (except for one fish in each Wild HV  
297 and LV and Hatchery HV when the time was 36 min by mistake). The water was aerated  
298 using air stones and pump (Sera Air 550R and Sera AS30 air stone) during the test. The  
299 buckets were placed in a flow-through buffer tank at a temperature matching the acclimation  
300 tanks (temperatures increased during the days of the measurement, 26–29 June 2017, from  
301 13.4 to 16.1°C), and left undisturbed in the dark for the duration of the confinement. Fish  
302 were then removed from buckets by dip-netting, anaesthetized using benzocaine solution,  
303 measured (to 1 mm) and weighed (to 0.1 g). Blood samples were collected within 2–5 min  
304 from the start of anesthesia. The sampling order of fish from the same tank during the same  
305 day was recorded. Blood was collected using 23 G heparinized needles and syringes and kept  
306 on ice temporarily until centrifuged at 4000 x g for 10 min. Plasma was collected in  
307 Eppendorf tubes and frozen at –20°C until analysis. Control samples for establishing baseline  
308 plasma cortisol concentrations were collected after terminal anesthesia as described above,

309 omitting the confinement stress treatment. Plasma cortisol concentration was determined  
310 using enzyme-linked immunosorbent assay (ELISA) (Enzo cortisol assay) as described in  
311 ESM1, available online.

312

### 313 **Sex determination from DNA samples**

314 To consider potential sex differences in the studied traits, we identified the sex of fish using  
315 PCR amplification of the sexually dimorphic *sdY* locus, which identifies the correct sex in  
316 brown trout with nearly 100% accuracy (Quéméré et al. 2014); details in ESM1, available  
317 online.

318

### 319 **Statistical analyses**

320 The number of individuals included in each analysis is shown in Table 1. We built univariate  
321 models for each response variable (metabolic and behavioral variables and cortisol level) to  
322 assess the differences between breeding group and acclimation conditions (Table 2). All  
323 analyses were conducted in R v.3.3.2 (R Core Team, 2016). Linear (LMM) and generalized  
324 mixed-effects models (GLMM) were fitted using package *lme4* (Bates et al. 2015) with  
325 *lmerTest* (Kuznetsova et al. 2017) and the frailty models using package *coxme* (Therneau,  
326 2018). The data were visualized using *ggplot2* (Wickham 2009) and *patchwork*  
327 (<https://github.com/thomasp85/patchwork>). Statistical significance was determined as  $\alpha =$   
328 0.05 in all models. Predicted means within groups were estimated for behavior traits with  
329 package *ggeffects* (Lüdtke 2018). The effect of sex was analyzed in separate models,  
330 including the fixed effect of sex as well as the effects from original models, except  
331 photoperiod or its interactions due to limited sample size with known sex. All linear models  
332 were checked for homoscedasticity and normality of residuals.

333

334  $\log_{10}$ -transformed  $\dot{M}O_{2,min}$  or  $\dot{M}O_{2,ave}$  were analyzed using an LMM with function *lmer*. The  
335 main effects of population, selection line, photoperiod and  $\log_{10}$ -body mass (in kg) were  
336 separately tested using linear hypothesis testing (function *lht* in package *car*) using restricted  
337 models, where each respective main effect and its interactions were defined zero and  
338 compared to the full model using F-tests.

339  
340 The difference in cortisol level of control fish and fish exposed to confinement stress was first  
341 tested using a one-tailed t-test. The post-confinement stress cortisol level was then analyzed  
342 using a linear model using function *lm*.

343  
344 Behavioral traits were analyzed using an LMM (*activity*), a frailty model (i.e. mixed effect  
345 Cox proportional hazards models for time-to event data (Collett 2015)) (*latency*) and a  
346 GLMM (Bernoulli-distributed *exploration tendency*). Trial repeats were encoded as -1, 0, and  
347 1 in data from angling selection experiment as 1–6 from burbot vs. control experiment. In 8  
348 trials, the fish jumped out of the start box prior to the trial and their behavior was analyzed for  
349 9 min 45 s min after the jump. Correlations between metabolic traits and activity were  
350 calculated from model residuals and best linear unbiased predictions (BLUPs), respectively,  
351 to assess potential underlying associations between the traits across all individuals.  
352 Correlations were not calculated for time-to-event data (*latency*) or binary data (*exploration*  
353 *tendency*). For further details see ESM1, available online, and Data accessibility.

354

## 355 **Results**

### 356 $\dot{M}O_{2,min}$ , $\dot{M}O_{2,ave}$ and stress-sensitivity

357 The LMM indicated significantly higher  $\dot{M}O_{2,min}$  in the offspring of wild fish than of hatchery  
358 fish, and a moderate interaction effect between photoperiod and population, wild population

359 having higher values than hatchery population in the 12:12 L:D photoperiod. Interaction was  
360 also found for population and angling selection line, hatchery LV fish tending to have higher  
361 oxygen uptake than HV fish, while selection lines did not differ in the wild population (Fig.  
362 2A; Table 3).  $\dot{M}O_{2,ave}$  was higher in wild than in hatchery population, with a modest  
363 interaction effect of angling selection in the two populations (non-significant,  $P = 0.085$ ),  
364 observed as higher  $\dot{M}O_{2,ave}$  in hatchery LV compared to hatchery HV, but no effect of angling  
365 selection in the wild population (Fig. 2B). Sex did not have a significant effect on either  
366  $\dot{M}O_{2,min}$  (Type III test,  $F_{1,58} = 0.901$ ,  $P = 0.346$ ) or  $\dot{M}O_{2,ave}$  ( $F_{1,58.577} = 0.1823$ ,  $P = 0.671$ ).

367  
368 Plasma cortisol increased ~seven-fold in individuals subjected to confinement stress (mean =  
369 140.62 ng mL<sup>-1</sup>, SD = 41.00) compared to non-stressed fish (mean = 19.22 ng mL<sup>-1</sup>, SD =  
370 20.65), (t-test,  $t = 11.125$ ,  $df = 29.523$ ,  $P < 0.001$ ). Angling selection or population did not  
371 significantly affect the level of post-stress plasma cortisol, although it showed a similar  
372 tendency as observed in  $\dot{M}O_{2,ave}$  (Table 3, Fig. S3, available online).

373

#### 374 *Behavior in angling selection lines*

375 Fish emerged from the start box during the recorded time in ~84% of the trials. There was a  
376 slightly non-significant interaction effect ( $P = 0.054$ ) of population background and angling  
377 selection on latency (Table 4). This was observed as an elevated probability to emerge in fish  
378 from LV background compared to HV background in the hatchery population, but not in the  
379 wild population (Fig. 3A).

380

381 Fish were less active after acclimation in constant light compared to the 12:12 L:D  
382 photoperiod, but activity did not differ between populations or angling selection lines (Fig.  
383 3B; Table 4). Angling selection had contrasting effects on exploration tendency in each



384 population: in the hatchery population, a higher proportion of fish from LV selection line  
385 were explorative than from HV selection line, while there was an opposite tendency in the  
386 wild population (Fig. 3C; Table 4). In addition, exploration tendency increased with repeats  
387 of the behavioral trial. Sex did not have a significant effect on any behavior trait (female vs  
388 male, Activity:  $F_{1,39,612} = 1.217, P = 0.277$ ; Latency:  $e^{coef} = 1.03, z = 0.29, P = 0.770$ ;  
389 Exploration tendency:  $z = -0.514, P = 0.607$ ). There was no correlation between the BLUPs  
390 of activity and residual  $\dot{M}O_{2,min}$  (Pearson  $r = 0.02$ ) or  $\dot{M}O_{2,ave}$  (Pearson  $r = -0.04$ ).

391

### 392 *Behavioral responses to predator presence*

393 The fish tended to be less active ( $P = 0.072$ ) in the presence of burbot than under control  
394 conditions (Table 5). The variance of activity between individuals appeared higher in the  
395 presence of burbot, but this was not significant in Levene's test of homogeneity of variance  
396 ( $F_{1,93} = 0.214, P = 0.645$ ). Activity decreased slightly with increasing behavior trial repeats.  
397 Latency was not affected by predator cues (non-significant increase in probability to emerge  
398 by 9%), but it increased with increasing behavior trial repeats and between-individual  
399 variation in latency was high (~10% higher variance in burbot vs control data compared to  
400 data from angling selection lines). The exploration tendency of fish was not affected by  
401 predator cues.

402

## 403 **Discussion**

### 404 *Population-specific effects of angling selection on boldness*

405 Captured and non-captured parent brown trout produced offspring that differed in boldness-  
406 related traits during their second summer. Surprisingly, boldness, measured as latency to  
407 explore a novel arena, was lower in the HV fish than in the LV fish in the hatchery  
408 population. This was a contradictory finding as angling is expected to select against boldness

409 (Arlinghaus et al. 2017). The wild population showed a weaker difference between selection  
410 lines, but its direction was more in line with the theory, with HV fish being bolder than LV  
411 fish. Activity during the behavioral trials was not affected by angling selection. In contrast,  
412 activity was affected by photoperiod, which suggests a connection between energy  
413 demand/expenditure and photoperiod through activity.

414

415 The unexpected result of angling-vulnerability related low boldness in hatchery population  
416 may be explained by the hatchery rearing environment through several indirect effects. First,  
417 the parent fish that were vulnerable to angling may have had the least strict preference for the  
418 standard feeds, as they accepted the colourful, unnatural fly patterns. Second, the vulnerable  
419 fish may have had the lowest status in the dominance hierarchy within the ponds, and  
420 therefore been the hungriest and likeliest to attack lures. Third, the hatchery-history itself, i.e.  
421 inadvertent domestication, might have selected for the most proactive individuals. This, in  
422 turn, could have shifted the vulnerability in this population towards more reactive fish that  
423 may have more flexibility in their behavior.

424

425 In contrast to the hatchery population, angling trials on wild parent fish were more  
426 representative of real angling situations in the field. The wild fish had natural invertebrate  
427 food available in their ponds, and the structured ponds offered more hiding places. The wild  
428 fish had clearly lower catchability than the hatchery fish, and the wild fish could only be  
429 captured when approaching the undisturbed pond from a distance. Very few wild fish were  
430 captured in one angling session (maximum 4) compared to the hatchery fish (maximum 11).  
431 The captured and non-captured parent fish did not show evident size-differences, indicating  
432 that the effects of angling were most likely mediated by size-independent traits.

433

434 *Stress coping styles and angling selection*

435 A possible consequence of angling selection is a change in the frequencies of not only bold  
436 and timid individuals, but also stress-tolerant and stress-sensitive individuals, due to the  
437 association of angling vulnerability, behavior and stress coping styles (Vindas et al. 2017a).  
438 Furthermore, the POLS theory suggests that stress coping styles, along with metabolic rate  
439 and other traits, are connected to life-history traits, which vary along a slow-fast continuum  
440 (e.g., (Dammhahn et al. 2018; Reale et al. 2010). Stress coping styles and POLS concepts  
441 therefore provide frameworks for testing the consequences of angling induced selection.

442  
443 In largemouth bass, cortisol response to a standard stressor was negatively associated with  
444 capture probability, as expected (Louison et al. 2017). Koeck et al. (2018) found a weak  
445 negative effect (~0.5% change in risk) of high cortisol response on vulnerability to angling in  
446 a domestic strain of rainbow trout (*Oncorhynchus mykiss*), but there was no similar  
447 relationship in a wild strain of brown trout. In our study, stress sensitivity, expressed as a  
448 cortisol response to confinement, was not affected by angling-selection, although these tests  
449 suffered from low statistical power. However, a higher response in hatchery LV fish  
450 compared to HV was more visible through  $\dot{M}O_{2,ave}$ , which is notable given that confinement  
451 in the respirometer can induce a stress response in fish (Murray et al. 2017) and increase their  
452 oxygen uptake. Thus, the trends between HV and LV in the hatchery population observed in  
453 the cortisol response and  $\dot{M}O_{2,ave}$  suggest potential for angling selection for increased stress  
454 sensitivity, which might become more visible after multiple generations of selection. These  
455 results suggest that the individuals of LV selection line within the hatchery population  
456 showed a more reactive stress coping style than HV line. Differences in coping styles could  
457 also partly explain why the behavior interpreted as boldness showed a pattern contradicting  
458 our expectations; if the LV fish were more reactive compared to the HV fish, their behavior in

459 the personality trial may have indicated a higher stress response to the experiment and  
460 heightened escape behavior (Laskowski et al. 2016). The stress test and  $\dot{M}O_{2,ave}$  results are in  
461 agreement with the hypothesis that the wild population displayed a more reactive coping style  
462 compared to the hatchery population.

463

464 Whether  $\dot{M}O_{2,min}$  is connected to the coping styles/POLS's or angling selection remains  
465 inconclusive based on our results. A lack of association between metabolic rate and  
466 personality has been reported previously in other species, such as the Trinidadian guppy  
467 (*Poecilia reticulata*) (White et al. 2016). We found a trend of higher  $\dot{M}O_{2,min}$  in the hatchery  
468 LV line compared to HV line, and an opposite trend in wild fish, under 12:12 L:D  
469 photoperiod. The contrast between the populations in the response to angling selection is  
470 therefore in line with the behavioral results in latency and exploration tendency, but also with  
471 activity in the response to photoperiod, although there was no correlation between activity and  
472  $\dot{M}O_{2,min}$  after accounting for group differences. Again, as in boldness, the result in hatchery  
473 population was opposite to the prevailing theory, and it is possible that stronger effects from  
474 angling could be observed over several generations of selection in natural conditions. Growth  
475 rate is unlikely to explain the differences in  $\dot{M}O_{2,min}$  between groups, as the body mass of fish  
476 at the end of the experiment did not differ between groups (Table 1). Despite not directly  
477 addressing questions on trait covariances, as physiological traits were measured only once  
478 (Mathot and Frankenhuis 2018; Niemelä and Dingemanse 2018), our results add to the  
479 literature to promote the understanding of evolution in traits due to angling induced selection.

480 From an angling selection perspective, some of the most interesting traits to include in further  
481 experiments would be neurochemical stress responses and their links to the bold-shy  
482 behavioral axis, and a role for metabolic rate remains to be understood better in connection to  
483 these traits.

484

485 *Genetic and parental effects in population divergence and angling selection*

486 Populations frequently differ in e.g., metabolic rate and behavioral syndromes (Dingemanse et  
487 al. 2007; Lahti et al. 2002; Polverino et al. 2018), driven by environmental differences,  
488 natural selection, founder effects, and genetic drift. The differences we found between  
489 populations can therefore be explained by several factors, including the level of  
490 domestication, as the hatchery stock had been reared in captivity for several generations. They  
491 also differed in their life-histories, with the wild population being clearly resident and the  
492 hatchery population migratory (A. Lemopoulos, unpublished data). In addition, although we  
493 reared offspring under common garden conditions and maximized genetic diversity within  
494 each group, it is possible that differences in the early rearing environments of wild and  
495 hatchery parents could have had contrasting effects on offspring through parental or  
496 epigenetic effects (Crews et al. 2012; Reddon 2012). We studied individuals in their second  
497 summer, and parental effects usually affect early life-stages the most; for instance, maternal  
498 effects on metabolic traits have been shown to be negligible from 90 days post hatching in  
499 coral reef fish (Munday et al. 2017), although maternal stress affects many life-stages in  
500 three-spined stickleback (*Gasterosteus aculeatus*) (Bell et al. 2016; Metzger and Schulte  
501 2016). Additionally, parental effects may have also contributed to differences between the  
502 selection lines *via* stress resulting from angling (briefly increased cortisol level after angling  
503 shown, e.g., in Wilson et al. (2011)). It is nevertheless likely that for both population and  
504 angling selection line differences, genetic inheritance may explain our results at least partly,  
505 as both angling vulnerability and personality traits can be heritable in the studied populations  
506 (Ågren et al. 2019) or in other species (Dingemanse et al. 2009; Philipp et al. 2009).

507

508 *Potential effects of photoperiod on energy balance*

509 We incorporated environmental variation in our study as two different photoperiods. The  
510 results demonstrate, on one hand, that metabolic rate and swimming activity are sensitive to  
511 photoperiod, and on the other hand, that the other behavioral traits lack this sensitivity.  
512 Constant light is not encountered by brown trout during the winter months; hence the 24-hour  
513 light regime could be considered unnatural and potentially stressful for the fish. Constant light  
514 can disrupt entrainment of endogenous rhythms by inhibiting the synthesis of melatonin and  
515 by directly affecting photosensitive proteins (Falcón et al. 2010; Peirson et al. 2009). Based  
516 on our results, constant light had an inhibiting effect on fish swimming activity, and also  
517 decreased  $\dot{M}O_{2,min}$  in the wild population, indicating that energy metabolism in brown trout  
518 can be affected by (an unnatural) photoperiod. In general, non-tropical species are expected to  
519 be particularly sensitive to photoperiod disturbances due to the role of day length in  
520 anticipating seasonal changes in environmental conditions (Borniger et al. 2017).

521

#### 522 *Innate vs learned antipredatory responses*

523 Our goal was to study risk-taking behavior/boldness of offspring by subjecting fish to the  
524 olfactory cues of a natural predator that had fed on conspecifics. Wild brown trout typically  
525 increase the use of refuges under predation threat, while hatchery brown trout do not (Álvarez  
526 and Nicieza 2003). None of the individuals in the behavior trials in this study had been  
527 exposed to predators before the trials apart from potential traces of piscivore odors in the  
528 rearing water. The scarcity of responses to the presence of predator odor, measured in the  
529 offspring of wild fish, suggests only weak innate responses. Nevertheless, the tendency for  
530 lower activity in the presence of burbot than in control conditions resembles previously  
531 shown antipredator responses in fish (Álvarez and Nicieza 2003; Kopack et al. 2015).

532

#### 533 **Conclusions**

534 Our results demonstrate the potential for rapid fishing-induced evolution in a very popular  
535 target species. The effects of angling selection are somewhat contradictory between wild and  
536 hatchery populations of fish, which leads to new questions on the mechanisms behind the  
537 observed differences. For practical fisheries management, the results with the wild fish are  
538 more representative and generalizable and showed little evidence of selection in physiological  
539 or behavioral traits. Overall, our study supports earlier findings according to which angling  
540 may be a potentially significant driver of evolution in behavioral and physiological traits in  
541 harvested populations.

542

#### 543 **Author contributions**

544 A.V. and P.H. produced the selection lines, J.M.P, N.A. and A.V. designed the  
545 experiment, J.M.P., N.A., S.M. and A.L. collected the data, J.M.P. and L.M. analysed the  
546 data, J.M.P. wrote the initial draft of the manuscript. All authors contributed to preparing  
547 the manuscript.

548

#### 549 **Conflict of Interest**

550 The authors declare that they have no conflict of interest.

551

#### 552 **Acknowledgements**

553 We thank the staff of Kainuu Fisheries Research Station for their help in catching, breeding  
554 and rearing fish, Dr. Hannu Huuskonen for advice in setting up the respirometry, and Dr.  
555 Chris Elvidge for comments on the manuscript. J.M.P., A.V. and A.L. were supported by the  
556 Academy of Finland grant for A.V. (nr. 286261). J.M.P. was also supported by Oskar  
557 Öflund's foundation and by the Finnish Cultural Foundation. All applicable institutional  
558 and/or national guidelines for the care and use of animals were followed.

559

560 **Data accessibility**

561 All data and R codes for the models in this manuscript are available in Github

562 ([https://github.com/jprokkola/Strutta\\_repo](https://github.com/jprokkola/Strutta_repo)). Videos of behavior trials will be made publicly

563 available in Figshare (accession) upon acceptance for publication.

564

565 **Electronic Supplementary Material**

566 ESM1. Pdf-file including supplemental figures and methods.

567



568 **Literature Cited**

- 569 Adriaenssens B, Johnsson JI. 2011. Shy trout grow faster: exploring links between personality  
570 and fitness-related traits in the wild. *Behav Ecol* 22:135-143. doi:  
571 10.1093/beheco/arq185
- 572 Ågren A, Vainikka A, Janhunen M, Hyvärinen P, Piironen J, Kortet R. 2019. Experimental  
573 crossbreeding reveals strain-specific variation in mortality, growth and personality in  
574 the brown trout (*Salmo trutta*). *Sci Rep* 9. doi: 10.1038/s41598-018-35794-6
- 575 Allendorf FW, Hard JJ. 2009. Human-induced evolution caused by unnatural selection  
576 through harvest of wild animals. *Proc Natl Acad Sci USA* 106:9987-9994. doi:  
577 10.1073/pnas.0901069106
- 578 Álvarez D, Nicieza AG. 2003. Predator avoidance behaviour in wild and hatchery-reared  
579 brown trout: the role of experience and domestication. *J Fish Biol* 63:1565-1577. doi:  
580 10.1111/j.1095-8649.2003.00267.x
- 581 Andersen KH, Marty L, Arlinghaus R. 2018. Evolution of boldness and life history in  
582 response to selective harvesting. *Can J Fish Aquat Sci* 75:271-281. doi: 10.1139/cjfas-  
583 2016-0350
- 584 Araki H, Berejikian BA, Ford MJ, Blouin MS. 2008. Fitness of hatchery-reared salmonids in  
585 the wild. *Evol Appl* 1:342-355. doi: 10.1111/j.1752-4571.2008.00026.x
- 586 Arlinghaus R, Laskowski KL, Alós J, Klefoth T, Monk CT, Nakayama S, Schröder A. 2017.  
587 Passive gear-induced timidity syndrome in wild fish populations and its potential  
588 ecological and managerial implications. *Fish Fish* 18:360-373. doi: 10.1111/faf.12176
- 589 Audzijonyte A, Kuparinen A, Fulton EA. 2013. How fast is fisheries-induced evolution?  
590 Quantitative analysis of modelling and empirical studies. *Evol Appl* 6:585-595. doi:  
591 10.1111/eva.12044

- 592 Bates D, Maechler M, Bolker B, Walker S. 2015. Fitting Linear Mixed-Effects Models Using  
593 lme4. *J Stat Softw*, 67:1-48. doi:10.18637/jss.v067.i01
- 594 Bell AM, Laura KEM, Stein LR. 2016. Effects of mothers' and fathers' experience with  
595 predation risk on the behavioral development of their offspring in threespined  
596 sticklebacks. *Curr Opin Behav Sci* 7:28-32. doi: 10.1016/j.cobeha.2015.10.011
- 597 Biro PA, Post JR. 2008. Rapid depletion of genotypes with fast growth and bold personality  
598 traits from harvested fish populations. *Proc Natl Acad Sci USA* 105:2919-2922. doi:  
599 10.1073/pnas.0708159105
- 600 Borniger JC, Cisse YM, Nelson RJ, Martin LB. 2017. Seasonal Variation in Stress Responses.  
601 Pp 411-419 in Fink, G., ed. *Stress: Neuroendocrinology and Neurobiology*,  
602 Amsterdam : Elsevier/AP. doi: 10.1016/b978-0-12-802175-0.00041-3
- 603 Boulton K, Grimmer AJ, Rosenthal GG, Walling CA, Wilson AJ. 2014. How stable are  
604 personalities? A multivariate view of behavioural variation over long and short  
605 timescales in the sheepshead swordtail, *Xiphophorus birchmanni*. *Behav Ecol*  
606 *Sociobiol* 68:791-803. doi: 10.1007/s00265-014-1692-0
- 607 Brelin D, Petersson E, Dannewitz J, Dahl J, Winberg S. 2008. Frequency distribution of  
608 coping strategies in four populations of brown trout (*Salmo trutta*). *Horm Behav*  
609 53:546-556. doi: 10.1016/j.yhbeh.2007.12.011
- 610 Collett D. 2015. *Modelling Survival Data in Medical Research, Third Edition*. Chapman &  
611 Hall/CRC Texts in Statistical Science.
- 612 Coltman DW, O'Donoghue P, Jorgenson JT, Hogg JT, Strobeck C, Festa-Bianchet M. 2003.  
613 Undesirable evolutionary consequences of trophy hunting. *Nature* 426:655-658. doi:  
614 10.1038/nature02177

- 615 Conrad JL, Weinersmith KL, Brodin T, Saltz JB, Sih A. 2011. Behavioural syndromes in  
616 fishes: a review with implications for ecology and fisheries management. *J Fish Biol*  
617 78:395-435. doi: 10.1111/j.1095-8649.2010.02874.x
- 618 Cooke SJ, Suski CD, Ostrand KG, Wahl DH, Philipp DP. 2007. Physiological and behavioral  
619 consequences of long-term artificial selection for vulnerability to recreational angling  
620 in a teleost fish. *Physiol Biochem Zool* 80:480-490. doi: 10.1086/520618
- 621 Crews D, Gillette R, Scarpino SV, Manikkam M, Savenkova MI, Skinner MK. 2012.  
622 Epigenetic transgenerational inheritance of altered stress responses. *Proc Natl Acad*  
623 *Sci USA* 109:9143-9148. doi: 10.1073/pnas.1118514109
- 624 Dammhahn M, Dingemanse NJ, Niemelä PT, Réale D. 2018. Pace-of-life syndromes: a  
625 framework for the adaptive integration of behaviour, physiology and life history.  
626 *Behav Ecol Sociobiol* 72:62. doi: 10.1007/s00265-018-2473-y
- 627 Devine JA, Wright PJ, Pardoe HE, Heino M. 2012. Comparing rates of contemporary  
628 evolution in life-history traits for exploited fish stocks. *Can J Fish Aquat Sci* 69:1105-  
629 1120. doi: 10.1139/f2012-047
- 630 Dingemanse NJ, Van der Plas F, Wright J, Réale D, Schrama M, Roff DA, Van der Zee E,  
631 Barber I. 2009. Individual experience and evolutionary history of predation affect  
632 expression of heritable variation in fish personality and morphology. *Proc Biol Sci*  
633 276:1285-1293. doi: 10.1098/rspb.2008.1555
- 634 Dingemanse NJ, Wright J, Kazem AJN, Thomas DK, Hickling R, Dawney N. 2007.  
635 Behavioural syndromes differ predictably between 12 populations of three-spined  
636 stickleback. *J Anim Ecol* 76:1128-1138. doi: 10.1111/j.1365-2656.2007.01284.x
- 637 Falcón J, Migaud H, Muñoz-Cueto JA, Carrillo M. 2010. Current knowledge on the  
638 melatonin system in teleost fish. *Gen Comp Endocrinol* 165:469-482. doi:  
639 10.1016/j.ygcen.2009.04.026

- 640 Fugère V, Hendry AP. 2018. Human influences on the strength of phenotypic selection. Proc  
641 Natl Acad Sci USA 115:10070-10075. doi: 10.1073/pnas.1806013115
- 642 Härkönen L, Hyvärinen P, Paappanen J, Vainikka A. 2014. Explorative behavior increases  
643 vulnerability to angling in hatchery-reared brown trout. *Salmo trutta*). Can J Fish  
644 Aquat Sci 71:1900-1909. doi: 10.1139/cjfas-2014-0221
- 645 Hollins J, Thambithurai D, Koeck B, Crespel A, Bailey DM, Cooke SJ, Lindström J, Parsons  
646 KJ, Killen SS. 2018. A physiological perspective on fisheries-induced evolution. Evol  
647 Appl 11:561-576. doi: 10.1111/eva.12597
- 648 Horreo JL, Valiente AG, Ardura A, Blanco A, Garcia-Gonzalez C, Garcia-Vazquez E. 2018.  
649 Nature versus nurture? Consequences of short captivity in early stages. Ecol Evol  
650 8:521-529. doi: 10.1002/ece3.3555
- 651 Huntingford F, Adams C. 2005. Behavioural syndromes in farmed fish: implications for  
652 production and welfare. Behaviour 142:1207-1221.
- 653 Huntingford FA. 2004. Implications of domestication and rearing conditions for the behaviour  
654 of cultivated fishes. J Fish Biol 65:122-142. doi: 10.1111/j.1095-8649.2004.00562.x
- 655 Johnsson JI, Näslund J. 2018. Studying behavioural variation in salmonids from an ecological  
656 perspective: observations questions methodological considerations. Rev Fish Biol Fish  
657 28:795-823. doi: 10.1007/s11160-018-9532-3
- 658 Kern EMA, Robinson D, Gass E, Godwin J, Langerhans RB. 2016. Correlated evolution of  
659 personality, morphology and performance. Anim Behav 117:79-86. doi:  
660 10.1016/j.anbehav.2016.04.007
- 661 Killen SS, Marras S, McKenzie DJ. 2011. Fuel, fasting, fear: routine metabolic rate and food  
662 deprivation exert synergistic effects on risk-taking in individual juvenile European sea  
663 bass. J Anim Ecol 80:1024-1033. doi: 10.1111/j.1365-2656.2011.01844.x

- 664 Klefoth T, Pieterek T, Arlinghaus R. 2013. Impacts of domestication on angling vulnerability  
665 of common carp, *Cyprinus carpio*: the role of learning, foraging behaviour and food  
666 preferences. *Fisheries Management and Ecology* 20:174-186. doi: 10.1111/j.1365-  
667 2400.2012.00865.x
- 668 Koolhaas JM, de Boer SF, Coppens CM, Buwalda B. 2010. Neuroendocrinology of coping  
669 styles: Towards understanding the biology of individual variation. *Front*  
670 *Neuroendocrinol* 31:307-321. doi: 10.1016/j.yfrne.2010.04.001
- 671 Kopack CJ, Broder ED, Lepak JM, Fetherman ER, Angeloni LM. 2015. Behavioral responses  
672 of a highly domesticated, predator naive rainbow trout to chemical cues of predation.  
673 *Fish Res* 169:1-7. doi: 10.1016/j.fishres.2015.04.005
- 674 Kuznetsova A, Brockhoff PB, Christensen RHB. 2017). lmerTest Package: Tests in Linear  
675 Mixed Effects Models. *J Stat Softw*, 82:1–26. doi: 10.18637/jss.v082.i13.
- 676 Lahti K, Huuskonen H, Laurila A, Piironen J. 2002. Metabolic rate and aggressiveness  
677 between Brown Trout populations. *Funct Ecol* 16:167-174. doi: 10.1046/j.1365-  
678 2435.2002.00618.x
- 679 Laskowski KL, Monk CT, Polverino G, Alos J, Nakayama S, Staaks G, Mehner T,  
680 Arlinghaus R. 2016. Behaviour in a standardized assay, but not metabolic or growth  
681 rate, predicts behavioural variation in an adult aquatic top predator *Esox lucius* in the  
682 wild. *J Fish Biol* 88:1544-1563. doi: 10.1111/jfb.12933
- 683 Lemopoulos A, Prokkola JM, Uusi-Heikkilä S, Vasemägi A, Huusko A, Hyvärinen P,  
684 Koljonen ML, Koskiniemi J, Vainikka A. 2019. Comparing RADseq and  
685 microsatellites for estimating genetic diversity and relatedness Implications for brown  
686 trout conservation. *Ecol Evol* 9:2106-2120. doi: 10.1002/ece3.4905

- 687 Lennox RJ, Alos J, Arlinghaus R, Horodysky A, Klefoth T, Monk CT, Cooke SJ. 2017. What  
688 makes fish vulnerable to capture by hooks? A conceptual framework and a review of  
689 key determinants. *Fish Fish* 18:986-1010. doi: 10.1111/faf.12219
- 690 Louison MJ, Adhikari S, Stein JA, Suski CD. 2017. Hormonal responsiveness to stress is  
691 negatively associated with vulnerability to angling capture in fish. *J Exp Biol*  
692 220:2529-2535. doi: 10.1242/jeb.150730
- 693 Louison MJ, Stein JA, Suski CD. 2018. Metabolic phenotype is not associated with  
694 vulnerability angling in bluegill sunfish (*Lepomis macrochirus*). *Can J Zool* 96:1264-  
695 1271. doi: 10.1139/cjz-2017-0363
- 696 Lüdecke D. 2018. ggeffects: Tidy Data Frames of Marginal Effects from Regression Models.  
697 *Journal of Open Source Software* 3: 772. doi: 10.21105/joss.00772
- 698 Mathot KJ, Dingemanse NJ, Nakagawa S. 2019. The covariance between metabolic rate and  
699 behaviour varies across behaviours and thermal types: meta-analytic insights. *Biol*  
700 *Rev* 4:1056-1074. doi:10.1111/brv.12491
- 701 Mathot KJ, Frankenhuis WE. 2018. Models of pace-of-life syndromes (POLS): a systematic  
702 review. *Behav Ecol Sociobiol* 72. doi: 10.1007/s00265-018-2459-9
- 703 Metzger DCH, Schulte PM. 2016. Maternal stress has divergent effects on gene expression  
704 patterns in the brains of male and female threespine stickleback. *Proc Biol Sci* 283.  
705 doi: 10.1098/rspb.2016.1734
- 706 Moran NP, Mossop KD, Thompson RM, Wong BBM. 2016. Boldness in extreme  
707 environments: temperament divergence in a desert-dwelling fish. *Anim Behav*  
708 122:125-133. doi: 10.1016/j.anbehav.2016.09.024
- 709 Morgan JD, Iwama GK. 1996. Cortisol-induced changes in oxygen consumption and ionic  
710 regulation in coastal cutthroat trout (*Oncorhynchus clarki clarki*) parr. *Fish Physiol*  
711 *Biochem* 15:385-394. doi: 10.1007/bf01875581

- 712 Munday PL, Donelson JM, Domingos JA. 2017. Potential for adaptation to climate change in  
713 a coral reef fish. *Global Chang Biol* 23:307-317. doi: 10.1111/gcb.13419
- 714 Murray L, Rennie MD, Svendsen JC, Enders EC. 2017. Respirometry increases cortisol levels  
715 in rainbow trout *Oncorhynchus mykiss*: implications for measurements of metabolic  
716 rate. *J Fish Biol* 90:2206-2213. doi: 10.1111/jfb.13292
- 717 Näslund J, Johnsson JI. 2016. State-dependent behavior and alternative behavioral strategies  
718 in brown trout (*Salmo trutta* L.) fry. *Behav Ecol Sociobiol* 70:2111-2125. doi:  
719 10.1007/s00265-016-2215-y
- 720 Nelson JA. 2016. Oxygen consumption rate v. rate of energy utilization of fishes: a  
721 comparison and brief history of the two measurements. *J Fish Biol* 88:10-25. doi:  
722 10.1111/jfb.12824
- 723 Niemelä PT, Dingemanse NJ. 2018. Meta-analysis reveals weak associations between  
724 intrinsic state and personality. *Proc Biol Sci* 285. doi: 10.1098/rspb.2017.2823
- 725 Nussle S, Bornand CN, Wedekind C. 2009. Fishery-induced selection on an Alpine whitefish:  
726 quantifying genetic and environmental effects on individual growth rate. *Evol Appl*  
727 2:200-208. doi: 10.1111/j.1752-4571.2008.00054.x
- 728 Peirson SN, Halford S, Foster RG. 2009. The evolution of irradiance detection: melanopsin  
729 and the non-visual opsins. *Philos Trans R Soc Lond B Biol Sci* 364:2849-2865. doi:  
730 10.1098/rstb.2009.0050
- 731 Philipp DP, Cooke SJ, Claussen JE, Koppelman JB, Suski CD, Burkett DP. 2009. Selection  
732 for vulnerability to angling in largemouth bass. *Trans Am Fish Soc* 138:189-199. doi:  
733 10.1577/t06-243.1
- 734 Polverino G, Santostefano F, Diaz-Gil C, Mehner T. 2018. Ecological conditions drive pace-  
735 of-life syndromes by shaping relationships between life history, physiology and

- 736 behaviour in two populations of Eastern mosquitofish. *Sci Rep* 8. doi:  
737 10.1038/s41598-018-33047-0
- 738 Quéméré E, Perrier C, Besnard AL, Evanno G, Baglinière JL, Guiguen Y, Launey S. 2014.  
739 An improved PCR-based method for faster sex determination in brown trout (*Salmo*  
740 *trutta*) and Atlantic salmon (*Salmo salar*). *Conserv Genet Resour* 6:825-827. doi:  
741 10.1007/s12686-014-0259-8
- 742 Réale D, Garant D, Humphries MM, Bergeron P, Careau V, Montiglio PO. 2010. Personality  
743 and the emergence of the pace-of-life syndrome concept at the population level. *Philos*  
744 *Trans R Soc Lond B Biol Sci* 365:4051-4063. doi: 10.1098/rstb.2010.0208
- 745 Reddon AR. 2012. Parental effects on animal personality. *Behav Ecol* 23:242-245. doi:  
746 10.1093/beheco/arr210
- 747 Redpath TD, Cooke SJ, Suski CD, Arlinghaus R, Couture P, Wahl DH, Philipp DP. 2010.  
748 The metabolic and biochemical basis of vulnerability to recreational angling after  
749 three generations of angling-induced selection in a teleost fish. *Can J Fish Aquat Sci*  
750 67:1983-1992. doi: 10.1139/f10-120
- 751 Schjolden J, Backström T, Pulman KGT, Pottinger TG, Winberg S. 2005. Divergence in  
752 behavioural responses to stress in two strains of rainbow trout (*Oncorhynchus mykiss*)  
753 with contrasting stress responsiveness. *Horm Behav* 48:537-544. doi:  
754 10.1016/j.yhbeh.2005.04.008
- 755 Sutter DAH, Suski CD, Philipp DP, Klefoth T, Wahl DH, Kersten P, Cooke SJ, Arlinghaus R.  
756 2012. Recreational fishing selectively captures individuals with the highest fitness  
757 potential. *Proc Natl Acad Sci USA* 109:20960-20965. doi: 10.1073/pnas.1212536109
- 758 Svendsen MBS, Bushnell PG, Steffensen JF. 2016. Design and setup of intermittent-flow  
759 respirometry system for aquatic organisms. *J Fish Biol* 88:26-50. doi:  
760 10.1111/jfb.12797



- 761 Therneau TM. 2018). *coxme*: Mixed Effects Cox Models. R package version 2.2-7.  
762 <https://CRAN.R-project.org/package=coxme>
- 763 Thomson JS, Watts PC, Pottinger TG, Sneddon LU. 2011. Physiological and genetic  
764 correlates of boldness: Characterising the mechanisms of behavioural variation in  
765 rainbow trout, *Oncorhynchus mykiss*. *Horm Behav* 59:67-74. doi:  
766 10.1016/j.yhbeh.2010.10.010
- 767 Uusi-Heikkilä S, Whiteley AR, Kuparinen A, Matsumura S, Venturelli PA, Wolter C, Slate J,  
768 Primmer CR, Meinelt T, Killen SS, Bierbach D, Polverino G, Ludwig A, Arlinghaus  
769 R. 2015. The evolutionary legacy of size-selective harvesting extends from genes to  
770 populations. *Evol Appl* 8:597-620. doi: 10.1111/eva.12268
- 771 Uusi-Heikkilä S, Wolter C, Klefoth T, Arlinghaus R. 2008. A behavioral perspective on  
772 fishing-induced evolution. *Trends Ecol Evol* 23:419-421. doi:  
773 10.1016/j.tree.2008.04.006
- 774 Väättäinen R, Huuskonen H, Hyvärinen P, Kekäläinen J, Kortet R, Arnedo MT, Vainikka A.  
775 2018. Do metabolic traits, vulnerability to angling, or capture method explain  
776 boldness variation in Eurasian perch? *Physiol Biochem Zool* 91:1115-1128. doi:  
777 10.1086/700434
- 778 Vainikka A, Tammela I, Hyvärinen P. 2016. Does boldness explain vulnerability to angling in  
779 Eurasian perch *Perca fluviatilis*? *Curr Zool* 62:109-115. doi: 10.1093/cz/zow003
- 780 Vindas MA, Gorissen M, Höglund E, Flik G, Tronci V, Damsgard B, Thörnqvist PO, Nilsen  
781 TO, Winberg S, Øverli Ø, Ebbesson LOE. 2017a. How do individuals cope with  
782 stress? Behavioural, physiological and neuronal differences between proactive and  
783 reactive coping styles in fish. *J Exp Biol* 220:1524-1532. doi: 10.1242/jeb.153213

- 784 Vindas MA, Magnhagen C, Brännäs E, Øverli Ø, Winberg S, Nilsson J, Backström T. 2017b.  
785 Brain cortisol receptor expression differs in Arctic charr displaying opposite coping  
786 styles. *Physiol Behav* 177:161-168. doi: 10.1016/j.physbeh.2017.04.024
- 787 White SJ, Kells TJ, Wilson AJ. 2016. Metabolism, personality and pace of life in the  
788 Trinidadian guppy, *Poecilia reticulata*. *Behaviour* 153:1517-1543. doi:  
789 10.1163/1568539x-00003375
- 790 Wickham H. 2009. *ggplot2: Elegant Graphics for Data Analysis*. *Ggplot2: Elegant Graphics*  
791 *for Data Analysis*:1-212. doi: 10.1007/978-0-387-98141-3
- 792 Wilson ADM, Binder TR, McGrath KP, Cooke SJ, Godin JGJ. 2011. Capture technique and  
793 fish personality: angling targets timid bluegill sunfish, *Lepomis macrochirus*. *Can J*  
794 *Fish Aquat Sci* 68:749-757. doi: 10.1139/f2011-019
- 795 Wilson ADM, Brownscombe JW, Sullivan B, Jain-Schlaepfer S, Cooke SJ. 2015. Does  
796 Angling Technique Selectively Target Fishes Based on Their Behavioural Type?  
797 *PLoS One* 10. doi: 10.1371/journal.pone.0135848
- 798 Wong RY, Perrin F, Oxendine SE, Kezios ZD, Sawyer S, Zhou LR, Dereje S, Godwin J.  
799 2012. Comparing behavioral responses across multiple assays of stress and anxiety in  
800 zebrafish (*Danio rerio*). *Behaviour* 149:1205-1240. doi: 10.1163/1568539x-00003018
- 801 Ylönen H, Kortet R, Myntti J, Vainikka A. 2007. Predator odor recognition and antipredatory  
802 response in fish: does the prey know the predator diel rhythm? *Acta Oecol* 31:1-7. doi:  
803 10.1016/j.actao.2005.05.007

804

805 Tables

806 Table 1. The number of individuals in each group in each analysis, and fish total body length and mass (mean  $\pm$  SD) at the end of the experiment.

807

| Photoperiod | Group       | N<br>(metabolic<br>rate) | N<br>(latency) | N<br>(activity) | N (stress<br>response) | N (body<br>size) | N males /<br>females<br>(unknown) | Body length /<br>mm | Body mass /<br>g |
|-------------|-------------|--------------------------|----------------|-----------------|------------------------|------------------|-----------------------------------|---------------------|------------------|
|             | Hatchery    |                          |                |                 |                        |                  | 9 / 5 (1)                         |                     |                  |
|             | HV          | 15                       | 15             | 15              | 7                      | 14               |                                   | 117 $\pm$ 10        | 17.1 $\pm$ 4.3   |
| 12:12       | Hatchery LV | 7                        | 14             | 14              | 6                      | 14               | 6 / 2 (7)                         | 115 $\pm$ 13        | 16.5 $\pm$ 6.7   |
|             | Wild HV     | 11                       | 14             | 14              | 4                      | 14               | 6 / 6 (3)                         | 117 $\pm$ 7         | 17.4 $\pm$ 3.2   |
|             | Wild LV     | 14                       | 15             | 15              | 9                      | 14               | 7 / 7 (1)                         | 115 $\pm$ 9         | 16.6 $\pm$ 4.3   |
|             | Hatchery    |                          |                |                 |                        |                  | 6 / 3 (1)                         |                     |                  |
|             | HV          | 10                       | 10             | 10              | 0                      | 9                |                                   | 119 $\pm$ 9         | 17.7 $\pm$ 4.7   |
| 24          | Hatchery LV | 7                        | 10             | 10              | 0                      | 6                | 0 / 4 (6)                         | 124 $\pm$ 9         | 19.6 $\pm$ 3.9   |
|             | Wild HV     | 8                        | 10             | 10              | 0                      | 6                | 2 / 3 (5)                         | 116 $\pm$ 9         | 17.8 $\pm$ 7.1   |
|             | Wild LV     | 6                        | 10             | 10              | 0                      | 5                | 2 / 1 (7)                         | 119 $\pm$ 9         | 17.8 $\pm$ 3.0   |

808 Table 2. The main statistical models used in this study. Abbreviations explained below the  
 809 table.

810

| Study section                                    | Response variable                                                          | Model                                                                                                                                                                                                                                              |
|--------------------------------------------------|----------------------------------------------------------------------------|----------------------------------------------------------------------------------------------------------------------------------------------------------------------------------------------------------------------------------------------------|
| I. Angling selection experiment                  | $\text{Log}_{10}(\dot{M}O_{2,min})$ or $\text{Log}_{10}(\dot{M}O_{2,ave})$ | $y_{ij} = \beta_0 + \beta_1PHO_{ij} + \beta_2POP_{ij} + \beta_3SEL_{ij} + \beta_4POP_{ij} \times SEL_{ij} + \beta_5POP_{ij} \times PHO_{ij} + \beta_6POP_{ij} \times \log BM_{ij} + \beta_7 \log BM_{ij} + \beta_8 WT_{ij} + p_l + e_{ij}$         |
|                                                  | Stress sensitivity (post-stress plasma cortisol)                           | $y_i = \beta_0 + \beta_1POP_i + \beta_2SEL_i + \beta_3POP_i \times SEL_i + \beta_4ORD_i + \beta_5BL_i + \beta_6WT_i + e_i$                                                                                                                         |
|                                                  | Activity (proportion of time spent swimming during the trial)              | $y_{ijk} = \beta_0 + \beta_1PHO_{ijk} + \beta_2POP_{ijk} + \beta_3SEL_{ijk} + \beta_4POP_{ijk} \times SEL_{ijk} + \beta_5POP_{ijk} \times PHO_{ijk} + \beta_6REP_{ijk} + b_i + c_j + d_k + e_{ijk}$                                                |
|                                                  | Latency to emerge from the box                                             | $\lambda(t) = \lambda_0(t) e^{\beta_1PHO_{ijk} + \beta_2POP_{ijk} + \beta_3SEL_{ijk} + \beta_4POP_{ijk} \times SEL_{ijk} + \beta_5POP_{ijk} \times PHO_{ijk} + \beta_6REP_{ijk} + b_i + c_j + d_k}$                                                |
|                                                  | Exploration tendency (1 = explorative, 0 = unexplorative)                  | $y_{ij} \sim \text{Bernoulli}(p_{ijk})$<br>$\text{logit}(p_{ijk}) = \beta_0 + \beta_1PHO_{ijk} + \beta_2POP_{ijk} + \beta_3SEL_{ijk} + \beta_4POP_{ijk} \times SEL_{ijk} + \beta_5POP_{ijk} \times PHO_{ijk} + \beta_6REP_{ijk} + b_i + c_j + d_k$ |
| II. Behaviour responses to burbot olfactory cues | Activity                                                                   | $y_{ijk} = \beta_0 + \beta_1SEL_{ijk} + \beta_2TRE_{ijk} + \beta_3REP_{ijk} + \beta_4BL_{ijk} + b_i^{(1)}CON + b_i^{(2)}BUR + c_j + d_k + e_{ijk}$                                                                                                 |
|                                                  | Latency to emerge from the box                                             | $\lambda(t) = \lambda_0(t) e^{\beta_1SEL_{ijk} + \beta_2GR_{ijk} + \beta_3REP_{ijk} + \beta_4BL_{ijk} + b_i + c_j + d_k}$                                                                                                                          |
|                                                  | Exploration tendency                                                       | $y_{ijk} \sim \text{Bernoulli}(p_{ijk})$<br>$\text{logit}(p_{ijk}) = \beta_0 + \beta_1SEL_{ijk} + \beta_2GR_{ijk} + \beta_3REP_{ijk} + b_i + c_j + d_k$                                                                                            |

$\beta_0$  Intercept, *PHO* Photoperiod, *POP* Population, *SEL* Selection, *logBM*  $\text{Log}_{10}$  body mass in kg, *WT* Water temperature in °C, *ORD* Capture order from the same tank, *BL* Body length in mm – mean (118.8182 mm for I, 122.4464 mm for II), *REP* Trial repeat, *TRE* Treatment,  $p_l$  the random effect for chamber l,  $b_i$  random effect for fish i,  $c_j$  the random effect for arena j,  $d_k$  the random effect for batch k,  $e$  Residual,  $\lambda_0$  baseline hazard,  $t$  time, *CON* / *BUR* binary explanatory variables for burbot and control treatments.

811 Table 3. Results from models for  $\dot{M}O_{2,min}$  and  $\dot{M}O_{2,ave}$  and post-stress plasma cortisol. The  
812 zero levels for contrasts were: photoperiod 12:12, population hatchery, and selection line HV.  
813 For the LMMs, F and P- values for the interactions and temperature effect were obtained from  
814 Type III sums of squares and Satterthwaite approximation for degrees of freedom. For the  
815 other fixed effects, linear hypothesis tests using F-test on restricted models with each main  
816 effect and its interactions set to zero were used – residual degrees of freedom are given for  
817 these tests. For cortisol, Type III F-test shown with population and selection line fixed effects  
818 estimated using linear hypothesis tests. Significant ( $P < 0.05$ ) effects shown in bold. For  
819 intercepts, t-test values are shown.  
820

|                                                                                 | Fixed effects                               | Estimate ± SE                    | Num<br>df | Res / Den df  | F            | P                |
|---------------------------------------------------------------------------------|---------------------------------------------|----------------------------------|-----------|---------------|--------------|------------------|
| <i>Log</i> <sub>10</sub> ( <i>M</i> <i>O</i> <sub>2,<i>min</i></sub> )<br>(LMM) | Intercept                                   | 1.82 ± 0.29                      | 1         | 70            | 6.32 (t)     | <0.001           |
|                                                                                 | <b>Photoperiod</b>                          | <b>0.0024 ± 0.02</b>             | <b>2</b>  | <b>67.48</b>  | <b>4.03</b>  | <b>0.022</b>     |
|                                                                                 | <b>Population</b>                           | <b>-0.84 ± 0.38</b>              | <b>4</b>  | <b>52.71</b>  | <b>3.01</b>  | <b>0.026</b>     |
|                                                                                 | Selection                                   | 0.054 ± 0.02                     | 2         | 68.63         | 2.50         | 0.090            |
|                                                                                 | Temperature                                 | -0.0009 ± 0.02                   | 1         | 70            | 0.002        | 0.968            |
|                                                                                 | <b>Log<sub>10</sub> body mass</b>           | <b>1.15 ± 0.15</b>               | <b>2</b>  | <b>68.86</b>  | <b>35.22</b> | <b>&lt;0.001</b> |
|                                                                                 | Pop × selection                             | -0.068 ± 0.03                    | 1         | 70            | 3.86         | 0.053            |
|                                                                                 | <b>Pop ×<br/>photoperiod</b>                | <b>-0.07 ± 0.03</b>              | <b>1</b>  | <b>70</b>     | <b>4.51</b>  | <b>0.037</b>     |
|                                                                                 | <b>Pop × log<sub>10</sub> body<br/>mass</b> | <b>-0.51 ± 0.21</b>              | <b>1</b>  | <b>70</b>     | <b>5.65</b>  | <b>0.020</b>     |
|                                                                                 | <b>Random effects</b>                       | <b>Variance (SD<sup>2</sup>)</b> |           |               |              |                  |
|                                                                                 | Chamber                                     | 0                                |           |               |              |                  |
| Residual                                                                        | 0.07 <sup>2</sup>                           |                                  |           |               |              |                  |
| <i>Log</i> <sub>10</sub> ( <i>M</i> <i>O</i> <sub>2,<i>ave</i></sub> )<br>(LMM) | Intercept                                   | 1.18 ± 0.44                      | 1         | 72.50         | 2.66 (t)     | 0.010            |
|                                                                                 | Photoperiod                                 | -0.027 ± 0.04                    | 2         | 70.178        | 1.52         | 0.226            |
|                                                                                 | <b>Population</b>                           | <b>-0.72 ± 0.54</b>              | <b>4</b>  | <b>70.271</b> | <b>5.38</b>  | <b>&lt;0.001</b> |
|                                                                                 | <b>Selection</b>                            | <b>0.09 ± 0.04</b>               | <b>2</b>  | <b>70.763</b> | <b>3.17</b>  | <b>0.048</b>     |
|                                                                                 | Temperature                                 | -0.03 ± 0.04                     | 1         | 72.742        | 0.68         | 0.412            |
|                                                                                 | Log <sub>10</sub> body mass                 | 0.38 ± 0.22                      | 2         | 71.883        | 1.60         | 0.209            |
|                                                                                 | Pop × selection                             | -0.09 ± 0.05                     | 1         | 70.660        | 3.05         | 0.085            |
|                                                                                 | Pop × photoperiod                           | -0.03 ± 0.05                     | 1         | 70.373        | 0.36         | 0.550            |
|                                                                                 | Pop × log <sub>10</sub> body<br>mass        | -0.49 ± 0.30                     | 1         | 71.343        | 2.67         | 0.107            |
|                                                                                 | <b>Random effects</b>                       | <b>Variance (SD<sup>2</sup>)</b> |           |               |              |                  |
|                                                                                 | Chamber                                     | 0.029 <sup>2</sup>               |           |               |              |                  |
| Residual                                                                        | 0.109 <sup>2</sup>                          |                                  |           |               |              |                  |
| Post-stress<br>cortisol (LM)                                                    | Intercept                                   | 331.91 ± 225.90                  | 2963.0    | 1             | 2.16 (t)     | 0.162            |
|                                                                                 | Population                                  | 47.84 ± 30.43                    | 3392.6    | 2             | 2.47         | 0.142            |
|                                                                                 | Selection                                   | 19.35 ± 25.88                    | 767.1     | 2             | 0.56         | 0.466            |
|                                                                                 | Temperature                                 | -15.22 ± 15.38                   | 1343.9    | 1             | 0.98         | 0.338            |
|                                                                                 | Body length                                 | 0.07 ± 0.84                      | 8.3       | 1             | 0.006        | 0.939            |
|                                                                                 | Sampling order                              | -0.75 ± 3.93                     | 50.4      | 1             | 0.04         | 0.851            |
|                                                                                 | Pop × selection                             | -19.81 ± 37.59                   | 381.1     | 1             | 0.28         | 0.606            |
|                                                                                 | Residual                                    |                                  | 20587.6   | 15            |              |                  |

821

822

823 Table 4. Results of models for behaviour traits in brown trout from hatchery and wild  
824 populations and two angling selection lines (HV and LV). The zero levels for contrasts in all  
825 models were: photoperiod 12:12, population hatchery, and selection line HV. For model  
826 equations, see Table 2. For Activity, F and P-values for the interactions and trial repeat were  
827 obtained from Type III test, and for the other main effects from linear hypothesis tests using  
828 restricted models with each main effect and its interactions set to zero. Fixed effects with  $P <$   
829 0.05 shown in bold. For intercepts, t- or z-test values shown.  
830

831

|                                   |                        |                                  |                           |                   |                 |                  |
|-----------------------------------|------------------------|----------------------------------|---------------------------|-------------------|-----------------|------------------|
| Activity<br>(LMM)                 | <b>Fixed effects</b>   | <b>Estimate ± SE</b>             | <b>Num Df</b>             | <b>Res/Den Df</b> | <b>F</b>        | <b>P</b>         |
|                                   | <b>Intercept</b>       | <b>0.30 ± 0.04</b>               | <b>1</b>                  | <b>33.18</b>      | <b>7.78 (t)</b> | <b>&lt;0.001</b> |
|                                   | <b>Photoperiod</b>     | <b>-0.75 ± 0.04</b>              | <b>3</b>                  | <b>84.03</b>      | <b>6.53</b>     | <b>0.001</b>     |
|                                   | Population             | 0.08 ± 0.06                      | 3                         | 42.50             | 1.40            | 0.242            |
|                                   | Selection              | -0.01 ± 0.04                     | 2                         | 74.67             | 0.10            | 0.903            |
|                                   | Pop × selection        | 0.025 ± 0.06                     | 1                         | 197.41            | 1.28            | 0.259            |
|                                   | Photoperiod × pop      | -0.070 ± 0.06                    | 1                         | 81.43             | 1.37            | 0.245            |
|                                   | Trial repeat           | -0.017 ± 0.02                    | 1                         | 44.24             | 0.20            | 0.655            |
|                                   | <b>Random effects</b>  | <b>Variance (SD<sup>2</sup>)</b> |                           |                   |                 |                  |
|                                   | ID                     | 0.054 <sup>2</sup>               |                           |                   |                 |                  |
| Batch                             | 0.036 <sup>2</sup>     |                                  |                           |                   |                 |                  |
| Arena                             | 0.016 <sup>2</sup>     |                                  |                           |                   |                 |                  |
| Latency<br>(frailty<br>model)     | <b>Fixed effects</b>   | <b>Coef</b>                      | <b>e<sup>coef</sup></b>   | <b>SE</b>         | <b>z</b>        | <b>P</b>         |
|                                   | Photoperiod            | 0.13                             | 1.14                      | 0.26              | 0.49            | 0.630            |
|                                   | Population             | -0.083                           | 0.92                      | 0.30              | -0.27           | 0.780            |
|                                   | <b>Selection</b>       | <b>0.57</b>                      | <b>1.76</b>               | <b>0.26</b>       | <b>2.21</b>     | <b>0.027</b>     |
|                                   | Pop × selection        | -0.71                            | 0.49                      | 0.37              | -1.92           | 0.054            |
|                                   | Photoperiod × pop      | -0.060                           | 0.94                      | 0.38              | -0.16           | 0.870            |
|                                   | <b>Trial repeat</b>    | <b>0.23</b>                      | <b>1.26</b>               | <b>0.082</b>      | <b>2.83</b>     | <b>0.005</b>     |
|                                   | <b>Random effects</b>  | <b>Variance (SD<sup>2</sup>)</b> |                           |                   |                 |                  |
|                                   | ID                     | 0.625 <sup>2</sup>               |                           |                   |                 |                  |
|                                   | Batch                  | 0.079 <sup>2</sup>               |                           |                   |                 |                  |
| Arena                             | 0.097 <sup>2</sup>     |                                  |                           |                   |                 |                  |
| Exploration<br>tendency<br>(GLMM) | <b>Fixed effects</b>   | <b>Estimate ± SE</b>             | <b>Wald χ<sup>2</sup></b> | <b>Df</b>         | <b>P</b>        |                  |
|                                   | Intercept              | 0.55 ± 0.63                      | 0.88 (z)                  | 1                 | 0.380           |                  |
|                                   | <b>Photoperiod</b>     | <b>-0.63 ± 0.63</b>              | <b>1.80</b>               | <b>1</b>          | <b>0.179</b>    |                  |
|                                   | Population             | 1.07 ± 0.72                      | 0.058                     | 1                 | 0.810           |                  |
|                                   | Selection              | 1.54 ± 0.64                      | 0.43                      | 1                 | 0.511           |                  |
|                                   | <b>Pop × selection</b> | <b>-2.46 ± 0.92</b>              | <b>7.18</b>               | <b>1</b>          | <b>0.007</b>    |                  |
|                                   | Photoperiod × pop      | 0.07 ± 0.88                      | 0.006                     | 1                 | 0.936           |                  |
|                                   | <b>Trial repeat</b>    | <b>0.58 ± 0.21</b>               | <b>7.79</b>               | <b>1</b>          | <b>0.005</b>    |                  |
|                                   | <b>Random effects</b>  | <b>Variance (SD<sup>2</sup>)</b> |                           |                   |                 |                  |
|                                   | ID                     | 1.398 <sup>2</sup>               |                           |                   |                 |                  |
| Batch                             | 0.270 <sup>2</sup>     |                                  |                           |                   |                 |                  |
| Arena                             | 0.762 <sup>2</sup>     |                                  |                           |                   |                 |                  |

832

833



834 Table 5. Results of models for activity, latency and exploration tendency in the presence of  
 835 predatory olfactory cues and control conditions in brown trout. For activity, the t-test was  
 836 used with Satterthwaite approximations to degrees of freedom. The model was fit with  
 837 restricted maximum likelihood. For latency, proportional hazard estimates ( $\pm$  standard error)  
 838 are shown with hazard ratios ( $e^{coef}$ ). For latency and exploration tendency, Wald Chisquare  
 839 test was used to determine significance of fixed effects. The zero levels for contrasts in all  
 840 models were: treatment control and selection line HV. Significant effects ( $P < 0.05$ ) shown in  
 841 bold.

|                                   |                       |                                      |                              |              |                  |
|-----------------------------------|-----------------------|--------------------------------------|------------------------------|--------------|------------------|
| Activity<br>(LMM)                 | <b>Fixed effects</b>  | <b>Estimate <math>\pm</math> SE</b>  | <b>Den<br/>Df</b>            | <b>t</b>     | <b>P</b>         |
|                                   | <b>Intercept</b>      | <b>0.435 <math>\pm</math> 0.060</b>  | <b>23.25</b>                 | <b>7.198</b> | <b>&lt;0.001</b> |
|                                   | Selection line        | 0.012 $\pm$ 0.065                    | 9.59                         | 0.18         | 0.861            |
|                                   | Treatment             | -0.081 $\pm$ 0.042                   | 15.85                        | -1.928       | 0.072            |
|                                   | <b>Trial repeat</b>   | <b>-0.029 <math>\pm</math> 0.010</b> | <b>71.62</b>                 | <b>-2.97</b> | <b>0.004</b>     |
|                                   | Body length           | -0.00009 $\pm$ 0.004                 | 8.63                         | -0.02        | 0.984            |
|                                   | <b>Random effects</b> | <b>Variance (SD<sup>2</sup>)</b>     |                              |              |                  |
|                                   | ID (burbot)           | 0.122 <sup>2</sup>                   |                              |              |                  |
|                                   | ID (control)          | 0.077 <sup>2</sup>                   |                              |              |                  |
|                                   | Batch                 | 0.000                                |                              |              |                  |
|                                   | Arena                 | 0.000                                |                              |              |                  |
| Residual                          | 1.400 <sup>2</sup>    |                                      |                              |              |                  |
| Latency<br>(frailty<br>model)     | <b>Fixed effects</b>  | <b>Coef <math>\pm</math> SE</b>      | <b><math>e^{coef}</math></b> | <b>z</b>     | <b>P</b>         |
|                                   | Selection line        | 0.336 $\pm$ 0.372                    | 1.399                        | 0.900        | 0.370            |
|                                   | Treatment             | 0.089 $\pm$ 0.220                    | 1.093                        | 0.400        | 0.690            |
|                                   | Trial repeat          | 0.113 $\pm$ 0.065                    | 1.120                        | 1.759        | 0.080            |
|                                   | Body length           | -0.006 $\pm$ 0.026                   | 0.994                        | -0.230       | 0.820            |
|                                   | <b>Random effects</b> | <b>Variance (SD<sup>2</sup>)</b>     |                              |              |                  |
|                                   | ID                    | 0.661 <sup>2</sup>                   |                              |              |                  |
| Batch                             | 0.210 <sup>2</sup>    |                                      |                              |              |                  |
| Arena                             | 0.080 <sup>2</sup>    |                                      |                              |              |                  |
| Exploration<br>tendency<br>(GLMM) | <b>Fixed effects</b>  | <b>Estimate <math>\pm</math> SE</b>  | <b>z</b>                     | <b>P</b>     |                  |
|                                   | Intercept             | 1.449 $\pm$ 0.801                    | 1.808                        | 0.0706       |                  |
|                                   | Selection line        | 0.659 $\pm$ 0.724                    | 0.910                        | 0.363        |                  |
|                                   | Treatment             | -0.63 $\pm$ 0.487                    | -1.294                       | 0.196        |                  |
|                                   | Trial repeat          | -0.066 $\pm$ 0.142                   | -0.465                       | 0.642        |                  |
|                                   | <b>Random effects</b> | <b>Variance (SD<sup>2</sup>)</b>     |                              |              |                  |

---

|       |                            |
|-------|----------------------------|
| ID    | 1.140 <sup>2</sup>         |
| Batch | 0.000                      |
| Arena | $(1.847 \times 10^{-5})^2$ |

---

842

843

844 Figure Legends

845

846 Fig.1. 3D-illustration of the arena used in personality trials without the left side wall. Water  
847 flow direction is left-right. Burbot was placed in the area indicated by blue colour, upstream  
848 from the net (inaccessible to the brown trout). The grey box indicates the start box, where the  
849 fish was placed before the start of a trial. Latency was measured as time to emerge from the  
850 box. Activity was measured as swimming activity outside the start box arena after emergence.  
851 Exploration tendency was measured as the whole body of fish passing the gate indicated by  
852 an arrow.

853

854 Fig. 2. Means and 75% confidence intervals for A) mass-specific  $\dot{M}O_{2,min}$ , using mass-scaling  
855 exponent 0.928; and B) mass-specific  $\dot{M}O_{2,ave}$  using raw body mass (scaling exponent was  
856 0.19 and was not used). For statistical significance, see Table 3. Wild and hatchery  
857 populations shown with two angling selection lines produced from individuals with high  
858 (HV) or low (LV) vulnerability to angling. 12:12 = L:D rhythm, 24 = continuous light. N in  
859 each group shown in Table 1. Legend shown in A.

860

861 Fig. 3. Behavioural differences between two angling vulnerability selection lines (HV – high  
862 vulnerability, LV – low vulnerability) within the hatchery and wild populations. A) Curves  
863 showing the proportion of individuals emerged from the start box, drawn with Kaplan-Meier  
864 estimator. Photoperiods are combined within each breeding group, confidence intervals  
865 omitted for clarity. Higher proportion indicates higher boldness. B) Predicted activity from  
866 LMM with 75% confidence intervals for predicted values. Significantly lower activity was  
867 observed in 24 (constant light) compared to 12:12 (light-dark rhythm) (Table 4). C) Predicted  
868 exploration tendency from GLMM with 75% confidence intervals for predicted values.

869 Angling selection had opposing effects on exploration tendency in the two populations (Table

870 4). In B and C, predictions were made for the first trial repeat. For N in each group, see Table

871 1.

872 Fig. 1.  
873

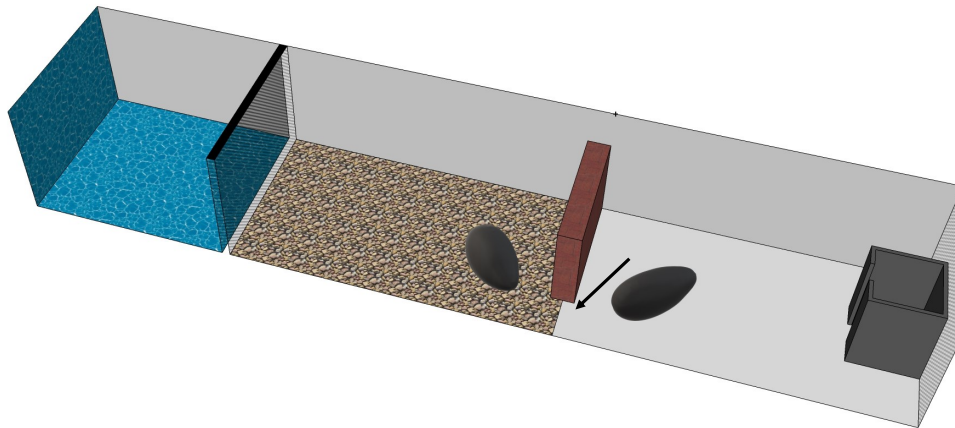

874

875 Fig. 2.  
876

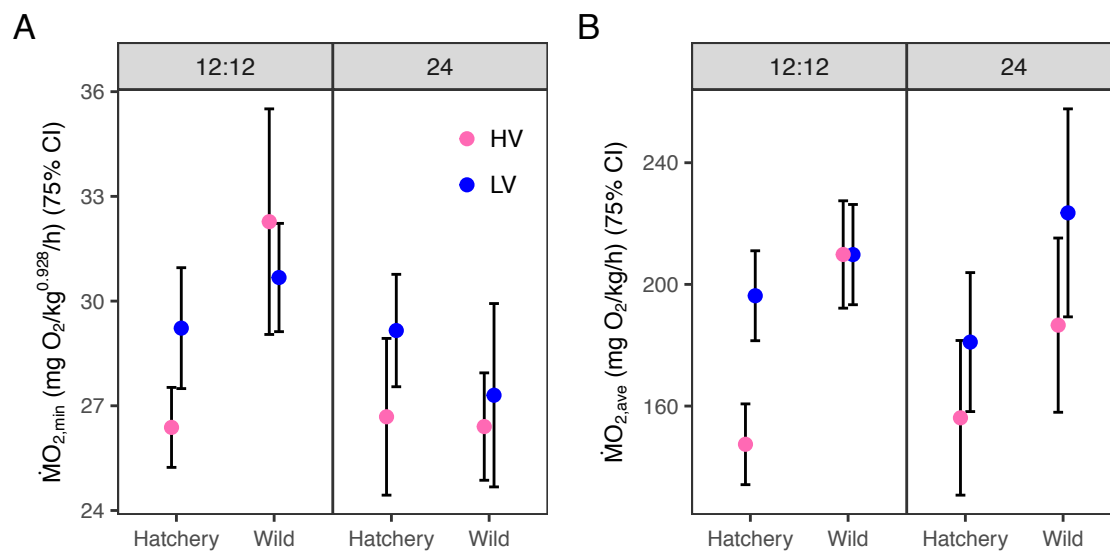

877  
878

879 Fig. 3.

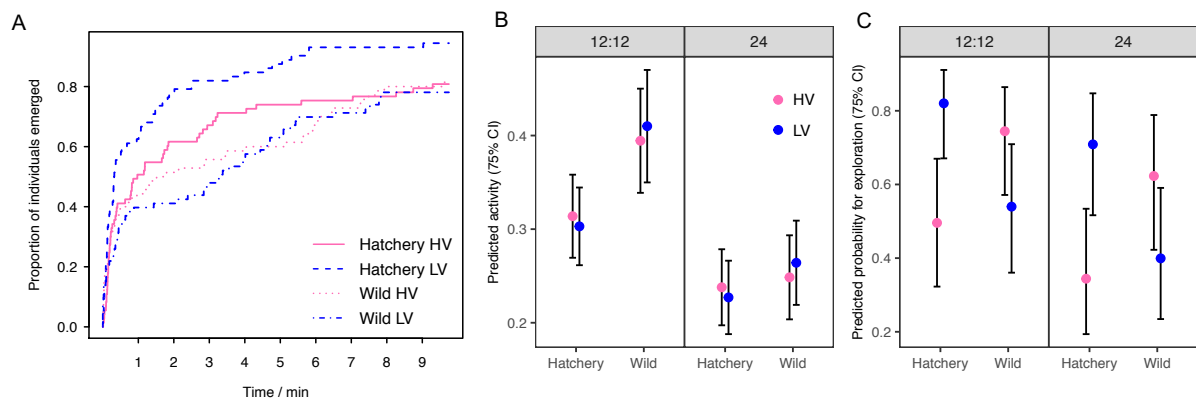

880
